# Supplementary material for: Chemo-Enzymatic Baeyer–Villiger Oxidation Facilitated with Lipases Immobilized in the Supported Ionic Liquid Phase
Source: MDPI journal article supplement (doi:10.3390/ma14133443), 2021-06-22
Supplement: s1 [file s1]

# Chemo-enzymatic Baeyer-Villiger oxidation facilitated with lipases immobilized in the supported ionic liquid phase

Anna Szelwicka <sup>1</sup>, Anna Wolny <sup>1</sup>, Mirosława Grymel <sup>2</sup>, Sebastian Jurczyk <sup>3</sup>,  
Sławomir Boncel <sup>2</sup> and Anna Chrobok <sup>1,\*</sup>

<sup>1</sup> Department of Chemical Organic Technology and Petrochemistry, Silesian University of Technology, Faculty of Chemistry, Krzywoustego 4, 44-100 Gliwice, Poland;  
Anna.Szelwicka@polsl.pl (A.S.); Anna.Wolny@polsl.pl (A.W.)

<sup>2</sup> Department of Organic Chemistry, Bioorganic Chemistry and Biotechnology, Silesian University of Technology, Faculty of Chemistry Krzywoustego 4, 44-100 Gliwice, Poland;  
Mirosława.Grymel@polsl.pl (M.G.); Sławomir.Boncel@polsl.pl (S.B.)

<sup>3</sup> Institute for Engineering of Polymer Materials and Dyes, Lukasiewicz Research Network, Skłodowskiej-Curie 55, 87-100 Toruń, Poland;  
Sebastian.Jurczyk@impib.lukasiewicz.gov.pl (S.J.)

\*Correspondence: Anna.Chrobok@polsl.pl (A.C.); Tel.: +48-32-237-2917

**Keywords:** supported ionic liquid phase, biocatalysis, lipase, chemo-enzymatic Baeyer-Villiger oxidation, heterogeneous catalysis, carbon nanotubes, immobilization

## Content

|                                                                                           |    |
|-------------------------------------------------------------------------------------------|----|
| Section S1. GC-MS analysis.....                                                           | 3  |
| Section S2. NMR analysis .....                                                            | 4  |
| Section S3. SEM-EDS analysis.....                                                         | 5  |
| Section S4. Thermogravimetric analysis .....                                              | 11 |
| Section S5. IR analysis.....                                                              | 21 |
| Section S6. XPS analysis.....                                                             | 23 |
| Section S7. Elemental analysis. ....                                                      | 26 |
| Section S8. Influence of the type of an enzyme on the recyclability of biocatalysts ..... | 27 |

## Section S1. GC-MS analysis

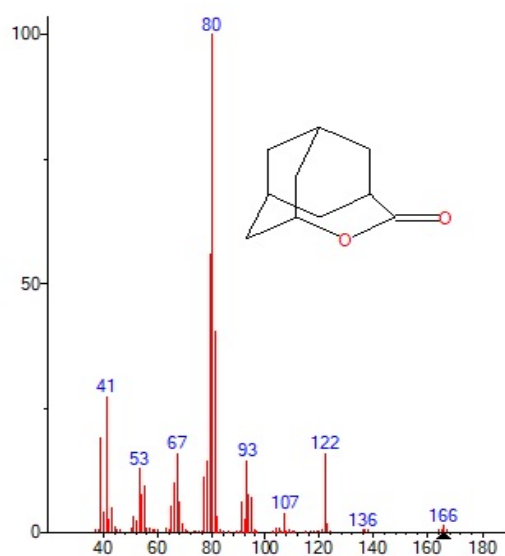

**Figure S1.** MS spectrum of 4-oxatricyclo[4.3.1.13.8]undecan-5-one (based on RTL mass spectral library).

## Section S2. NMR analysis

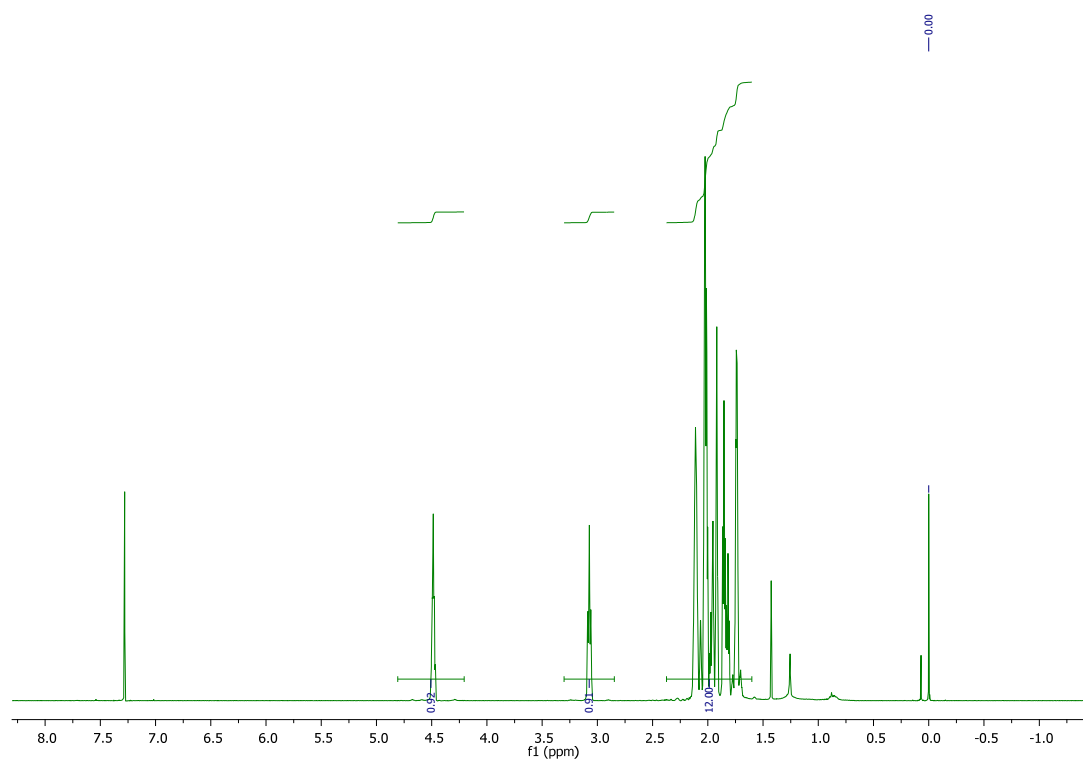

**Figure S2.**  $^1\text{H}$  NMR spectrum of 4-oxatricyclo[4.3.1.13.8]undecan-5-one. 7.28 -  $\text{CHCl}_3$  from  $\text{CDCl}_3$ . Impurities in a range of 0.0-1.5 ppm – solvents after extraction.

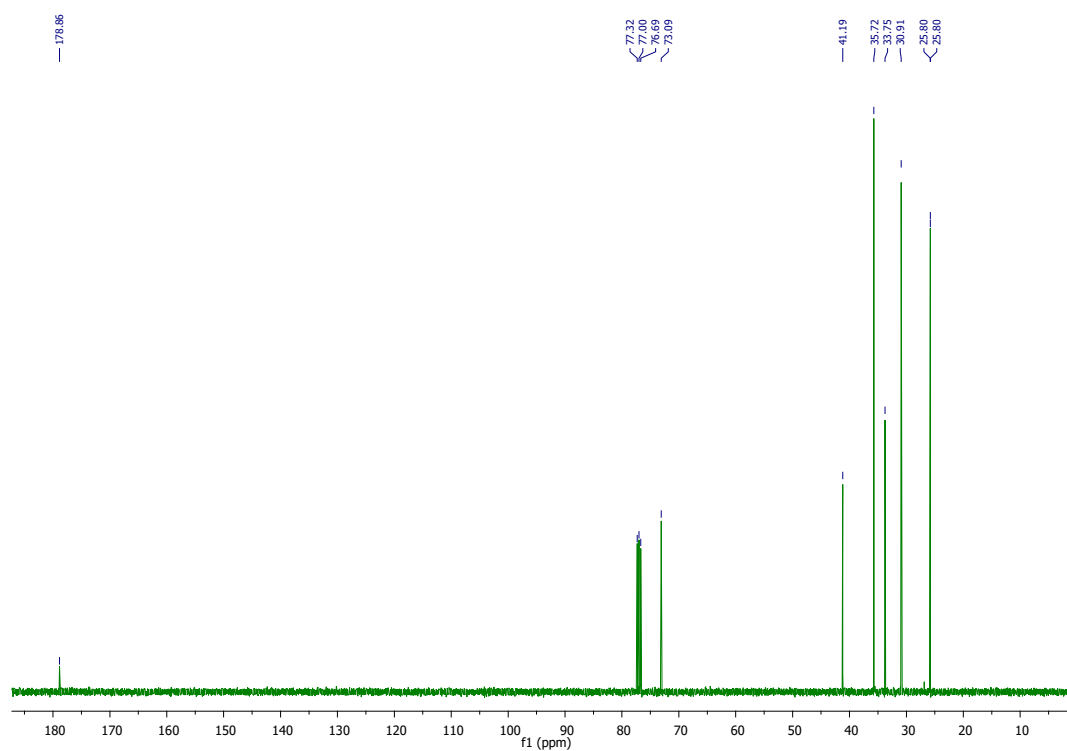

**Figure S3.**  $^{13}\text{C}$  NMR spectrum of 4-oxatricyclo[4.3.1.13.8]undecan-5-one.



### Section S3. SEM-EDS analysis

All SILLP materials were analyzed using SEM microscope equipped with EDS detector in order to confirm the presence of characteristic atoms in the structures. The qualitative analysis clearly confirmed a presence of expected elements in all structures.

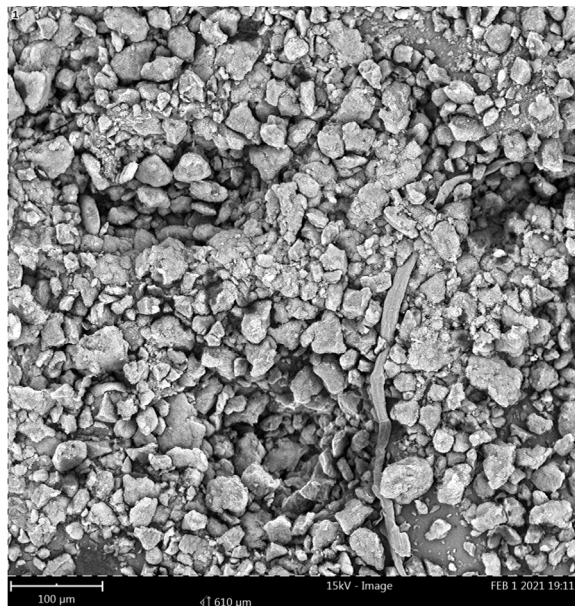

| Element Number | Element Symbol | Element Name | Atomic Conc. | Weight Conc. |
|----------------|----------------|--------------|--------------|--------------|
| 6              | C              | Carbon       | 88.38        | 85.81        |
| 8              | O              | Oxygen       | 6.38         | 8.25         |
| 7              | N              | Nitrogen     | 5.24         | 5.94         |

**Figure S4.** The SEM-EDS analysis of CNTs-CONH (A1).

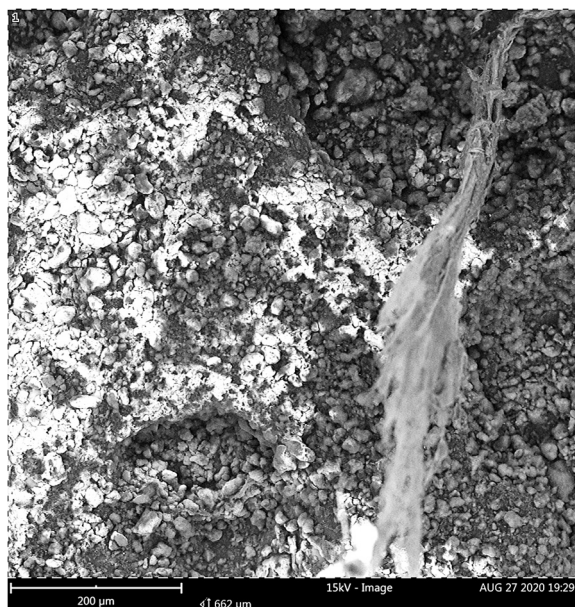

| Element Number | Element Symbol | Element Name | Atomic Conc. | Weight Conc. |
|----------------|----------------|--------------|--------------|--------------|
| 6              | C              | Carbon       | 83.72        | 79.17        |
| 8              | O              | Oxygen       | 9.89         | 12.46        |
| 7              | N              | Nitrogen     | 6.24         | 6.88         |
| 53             | I              | Iodine       | 0.15         | 1.49         |

**Figure S5.** The SEM-EDS analysis of CNTs-CONH-HEX-I (A2).

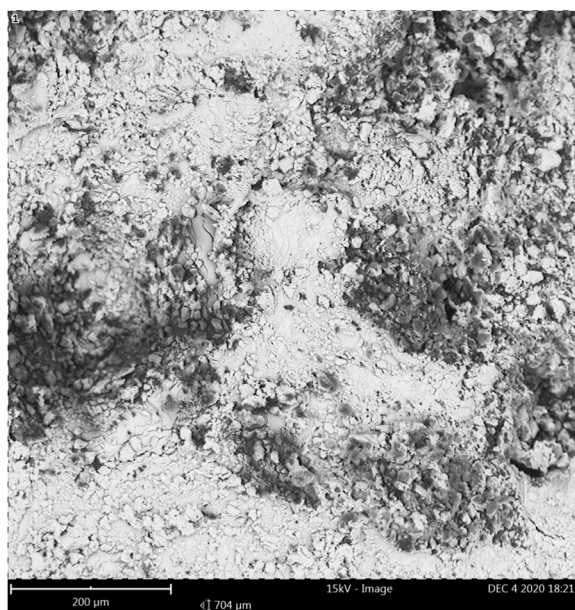

| Element Number | Element Symbol | Element Name | Atomic Conc. | Weight Conc. |
|----------------|----------------|--------------|--------------|--------------|
| 6              | C              | Carbon       | 76.65        | 73.03        |
| 7              | N              | Nitrogen     | 20.97        | 23.30        |
| 9              | F              | Fluorine     | 2.29         | 3.46         |
| 16             | S              | Sulfur       | 0.08         | 0.21         |

**Figure S6.** The SEM-EDS analysis of CNTs-CONH-HEX-N(Tf)<sub>2</sub> (A3).

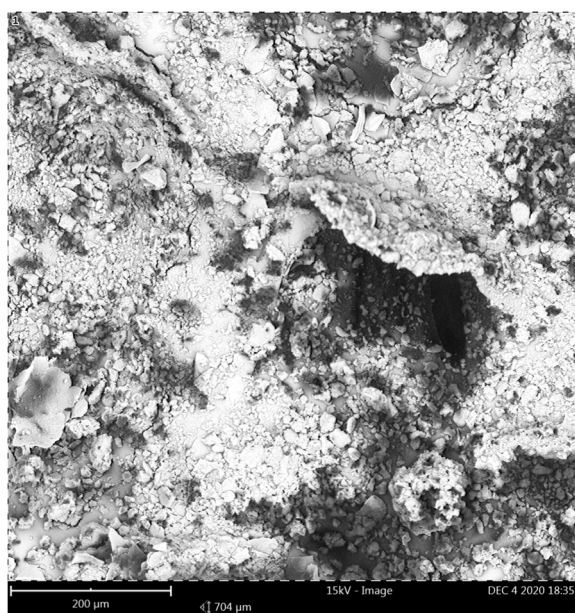

| Element Number | Element Symbol | Element Name | Atomic Conc. | Weight Conc. |
|----------------|----------------|--------------|--------------|--------------|
| 6              | C              | Carbon       | 74.54        | 71.52        |
| 7              | N              | Nitrogen     | 25.46        | 28.48        |

**Figure S7.** The SEM-EDS analysis of CNTs-CONH-HEX-N(CN)<sub>2</sub> (A4).

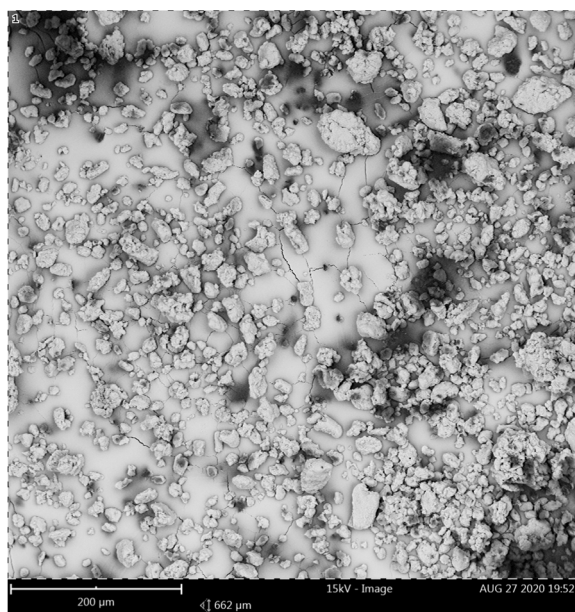

| Element Number | Element Symbol | Element Name | Atomic Conc. | Weight Conc. |
|----------------|----------------|--------------|--------------|--------------|
| 6              | C              | Carbon       | 57.80        | 52.28        |
| 7              | N              | Nitrogen     | 22.47        | 23.70        |
| 8              | O              | Oxygen       | 19.51        | 23.51        |
| 15             | P              | Phosphorus   | 0.22         | 0.51         |

**Figure S8.** The SEM-EDS analysis of CNTs-CONH-Oc<sub>2</sub>PO<sub>4</sub> (A5).

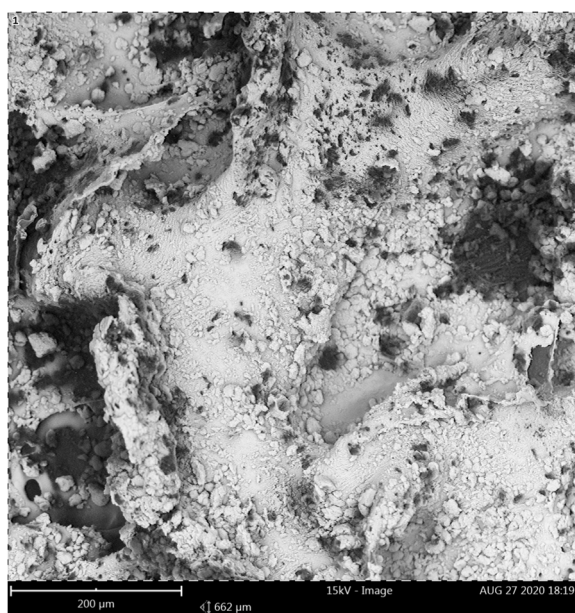

| Element Number | Element Symbol | Element Name | Atomic Conc. | Weight Conc. |
|----------------|----------------|--------------|--------------|--------------|
| 6              | C              | Carbon       | 56.50        | 50.42        |
| 8              | O              | Oxygen       | 28.41        | 33.78        |
| 7              | N              | Nitrogen     | 15.01        | 15.62        |
| 16             | S              | Sulfur       | 0.08         | 0.18         |

**Figure S9.** The SEM-EDS analysis of CNTs-CONH-OcSO<sub>4</sub> (A6).

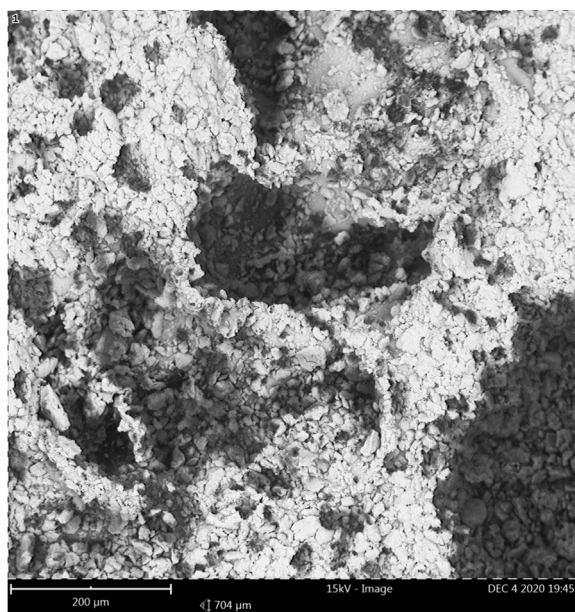

| Element Number | Element Symbol | Element Name | Atomic Conc. | Weight Conc. |
|----------------|----------------|--------------|--------------|--------------|
| 6              | C              | Carbon       | 84.10        | 80.49        |
| 7              | N              | Nitrogen     | 15.70        | 17.52        |
| 53             | I              | Iodine       | 0.20         | 1.98         |

**Figure S10.** The SEM-EDS analysis of CNTs-C=N-HEX-I (I2).

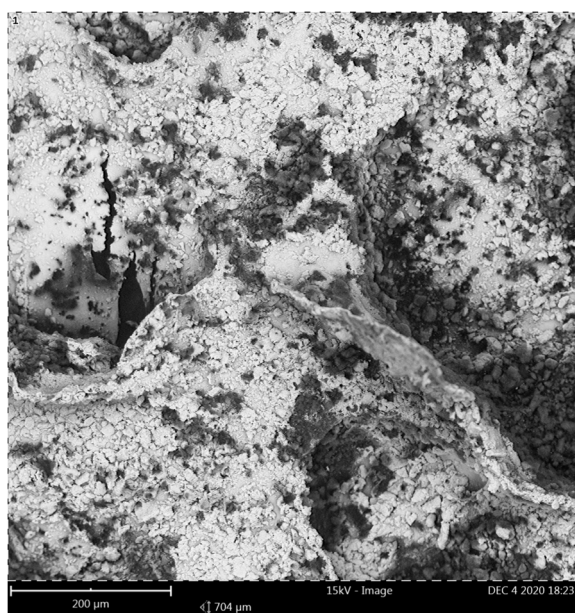

| Element Number | Element Symbol | Element Name | Atomic Conc. | Weight Conc. |
|----------------|----------------|--------------|--------------|--------------|
| 6              | C              | Carbon       | 78.23        | 74.65        |
| 7              | N              | Nitrogen     | 19.01        | 21.16        |
| 9              | F              | Fluorine     | 2.72         | 4.10         |
| 16             | S              | Sulfur       | 0.04         | 0.09         |

**Figure S11.** The SEM-EDS analysis of CNTs-C=N-HEX-N(Tf)<sub>2</sub> (I3).

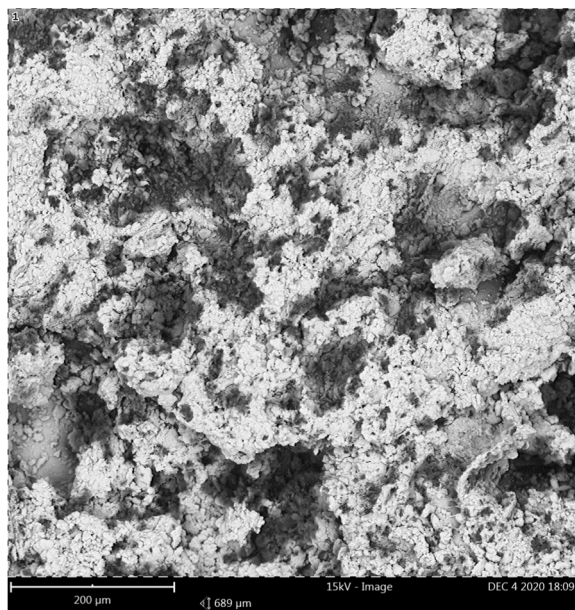

| Element Number | Element Symbol | Element Name | Atomic Conc. | Weight Conc. |
|----------------|----------------|--------------|--------------|--------------|
| 6              | C              | Carbon       | 74.10        | 71.04        |
| 7              | N              | Nitrogen     | 25.90        | 28.96        |

**Figure S12.** The SEM-EDS analysis of CNTs-C=N-HEX-N(CN)<sub>2</sub> (I4).

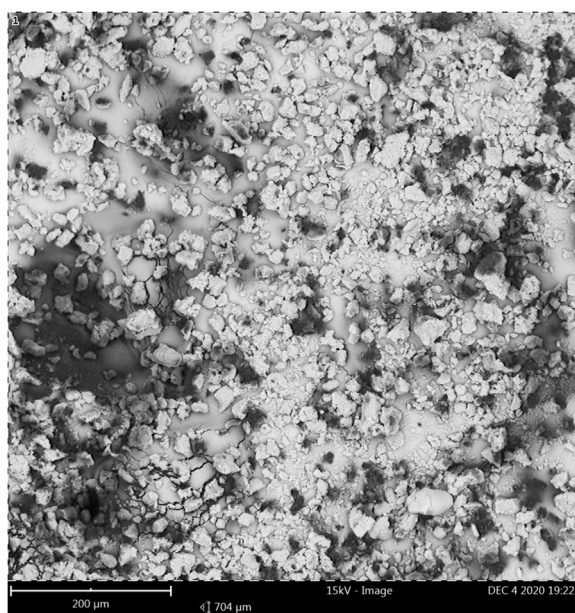

| Element Number | Element Symbol | Element Name | Atomic Conc. | Weight Conc. |
|----------------|----------------|--------------|--------------|--------------|
| 6              | C              | Carbon       | 72.65        | 67.59        |
| 8              | O              | Oxygen       | 16.83        | 20.86        |
| 7              | N              | Nitrogen     | 10.41        | 11.29        |
| 15             | P              | Phosphorus   | 0.11         | 0.26         |

**Figure S13.** The SEM-EDS analysis of CNTs-C=N-Oc<sub>2</sub>PO<sub>4</sub> (I5).

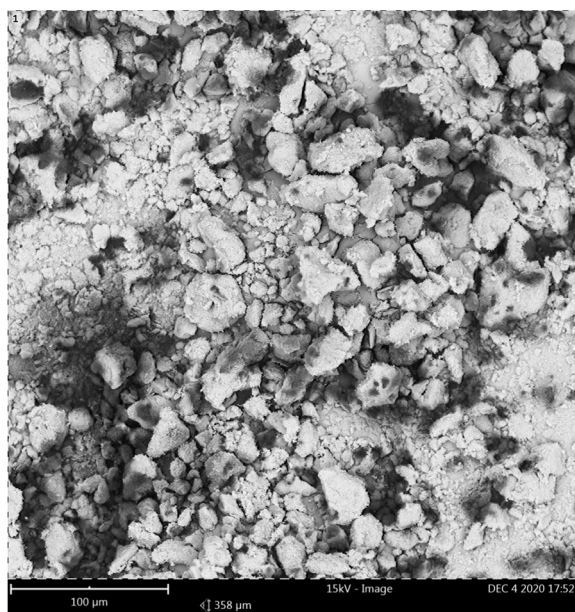

| Element Number | Element Symbol | Element Name | Atomic Conc. | Weight Conc. |
|----------------|----------------|--------------|--------------|--------------|
| 6              | C              | Carbon       | 69.20        | 63.86        |
| 8              | O              | Oxygen       | 15.21        | 18.69        |
| 7              | N              | Nitrogen     | 15.12        | 16.27        |
| 16             | S              | Sulfur       | 0.48         | 1.18         |

**Figure S14.** The SEM-EDS analysis of CNTs-C=N-OcSO<sub>4</sub> (I6).

## Section S4. Thermogravimetric analysis

Thermograms were collected for all materials and biocatalysts. The content of functional groups or adsorbed IL was determined based on the mass loss during analysis. The lipase content was determined based on a difference between mass of a biocatalyst and a support in a range of 180-450 °C.

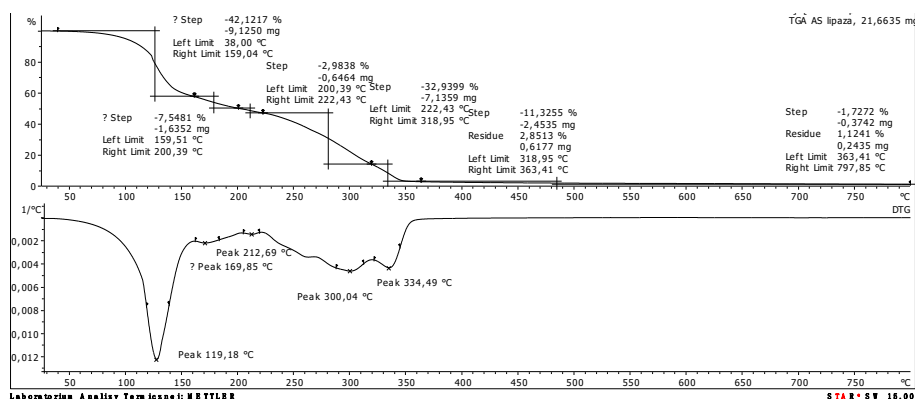

Figure S15. Thermogravimetric analysis of CALB.

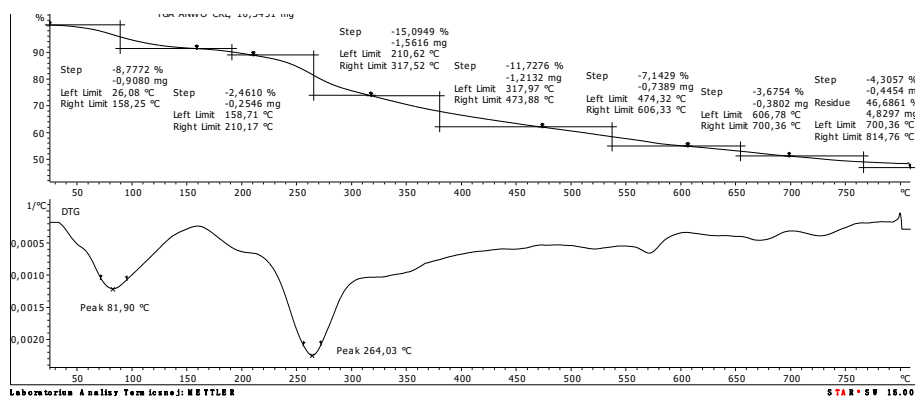

Figure S16. Thermogravimetric analysis of CRL.

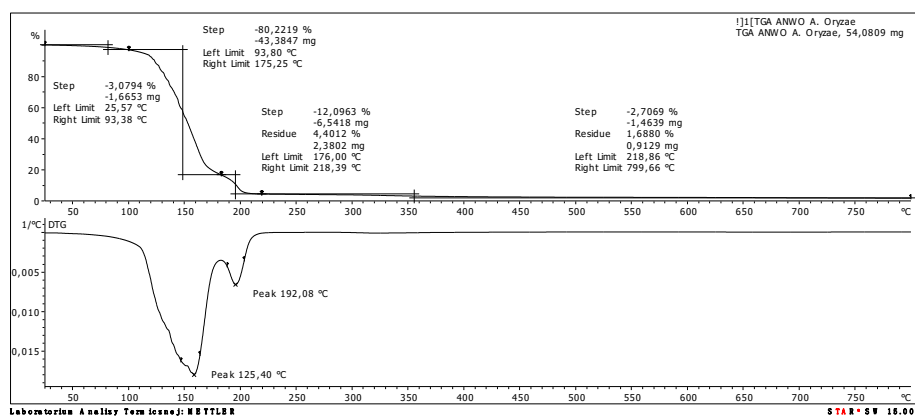

Figure S17. Thermogravimetric analysis of AOL.

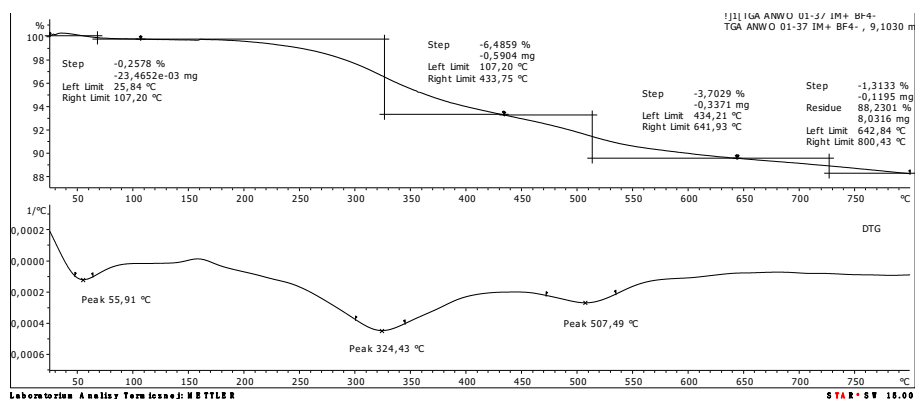

**Figure S18.** Thermogravimetric analysis of CNTs-CONH-OC<sub>2</sub>PO<sub>4</sub> (A5).

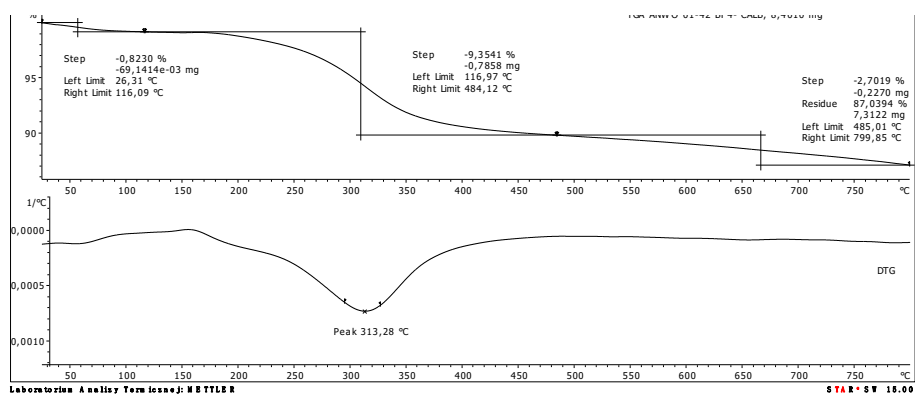

**Figure S19.** Thermogravimetric analysis of CALB-CNTs-CONH-OC<sub>2</sub>PO<sub>4</sub> (A5).

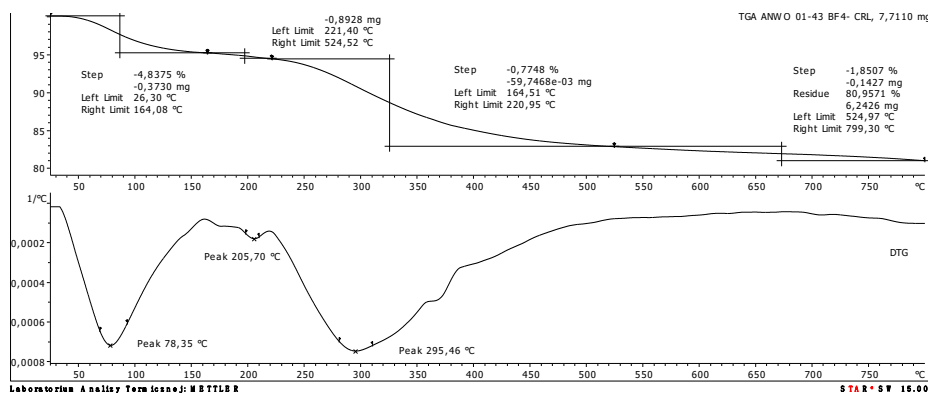

**Figure S20.** Thermogravimetric analysis of CRL-CNTs-CONH-OC<sub>2</sub>PO<sub>4</sub> (A5).



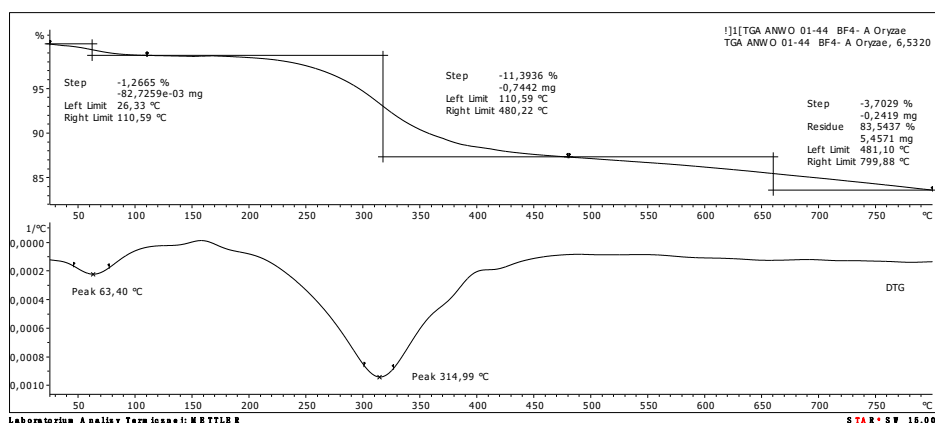

**Figure S21.** Thermogravimetric analysis of AOL-CNTs-CONH-OcPO<sub>4</sub> (A5).

Analysis for the rest of covalent structures and biocatalysts was performed similarly, nevertheless due to size of data these analyses were not included in this SI. Analyses remain available upon request from authors.

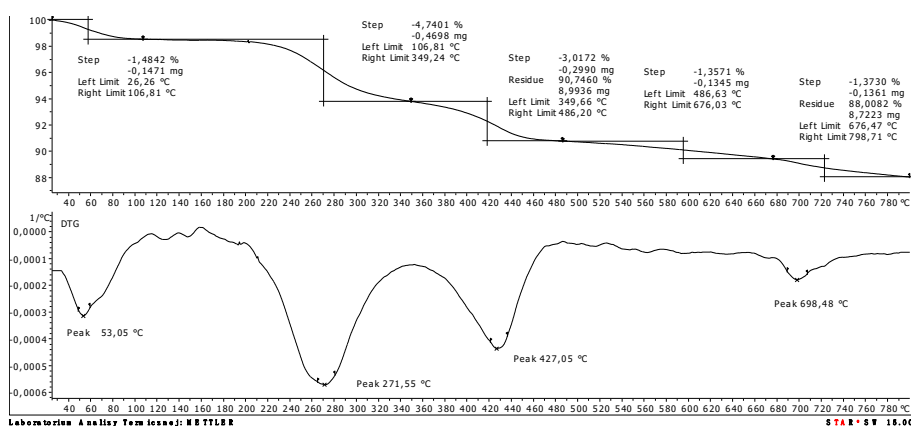

**Figure S22.** Thermogravimetric analysis of CNTs-CONH-[bmim][N(Tf)<sub>2</sub>] MR 1:0.1

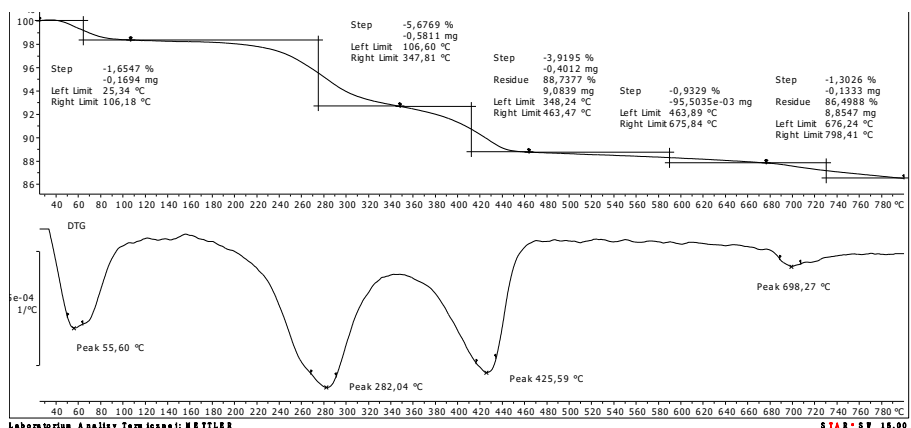

**Figure S23.** Thermogravimetric analysis of CNTs-CONH-[bmim][N(Tf)<sub>2</sub>] MR 1:0.3

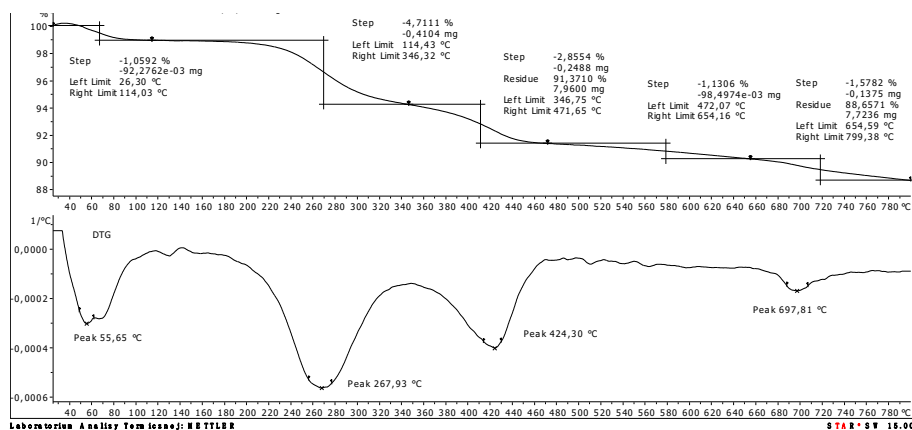

**Figure S24.** Thermogravimetric analysis of CNTs-CONH-[bmim][N(Tf)<sub>2</sub>] MR 1:0.5

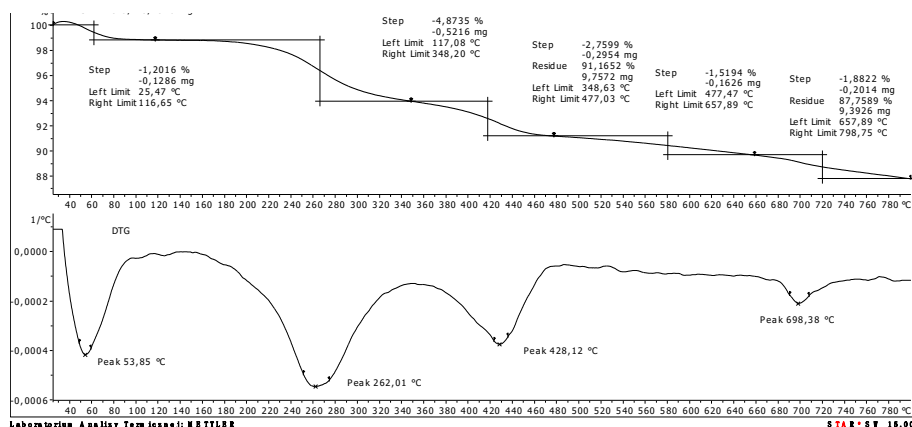

**Figure S25.** Thermogravimetric analysis of CNTs-CONH-[bmim][N(Tf)<sub>2</sub>] MR 1:0.8

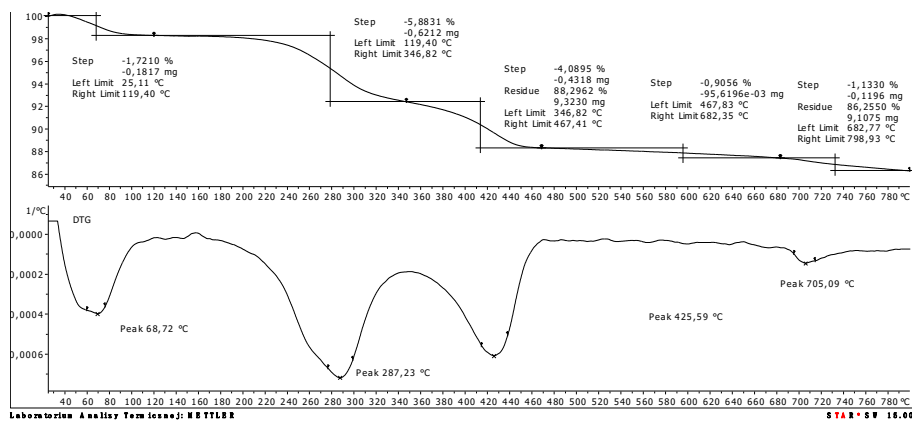

**Figure S26.** Thermogravimetric analysis of CNTs-CONH-[bmim][N(Tf)<sub>2</sub>] MR 1:1.1

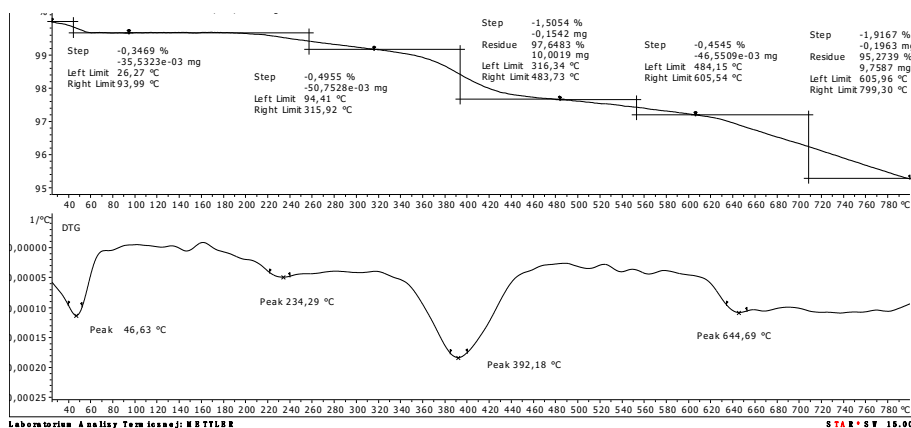

**Figure S27.** Thermogravimetric analysis of CNTs-C=N-[bmim][N(Tf)<sub>2</sub>] MR 1:0.1

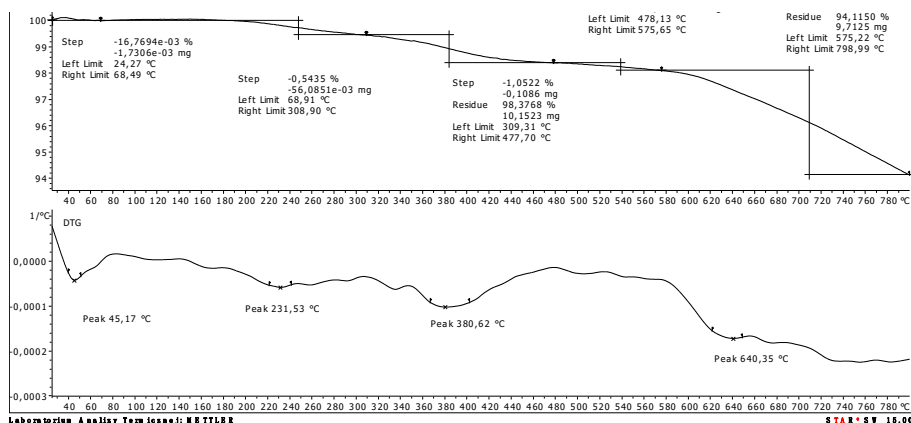

**Figure S28.** Thermogravimetric analysis of CNTs-C=N-[bmim][N(Tf)<sub>2</sub>] MR 1:0.3

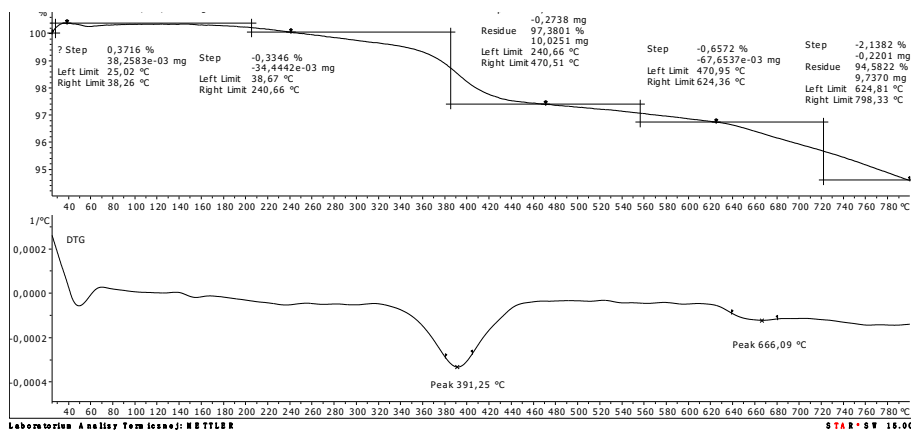

**Figure S29.** Thermogravimetric analysis of CNTs-C=N-[bmim][N(Tf)<sub>2</sub>] MR 1:0.5

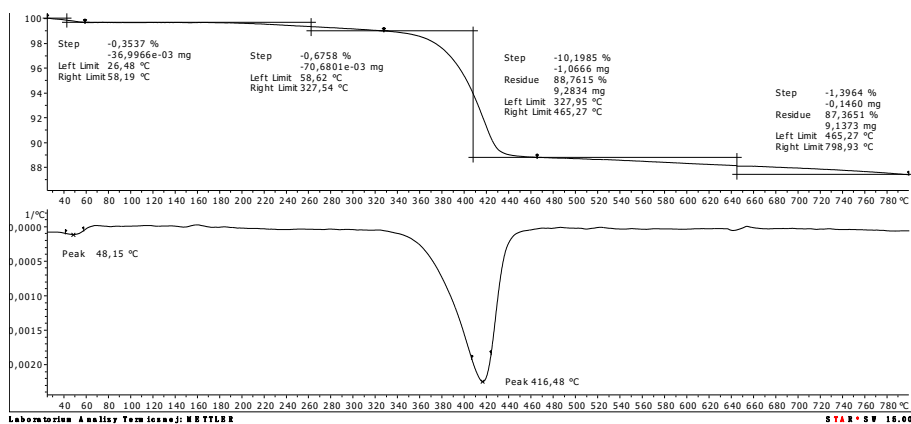

**Figure S30.** Thermogravimetric analysis of CNTs-C=N-[bmim][N(Tf)<sub>2</sub>] MR 1:0.8

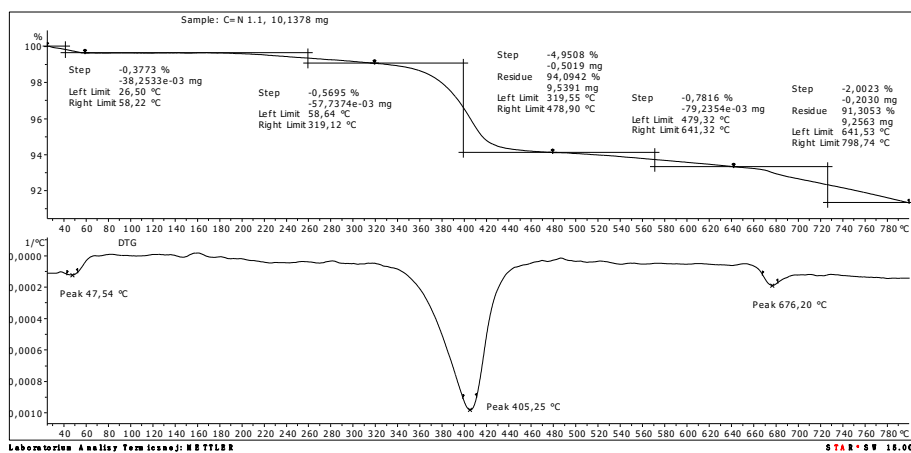

**Figure S31.** Thermogravimetric analysis of CNTs-C=N-[bmim][N(Tf)<sub>2</sub>] MR 1:1.1

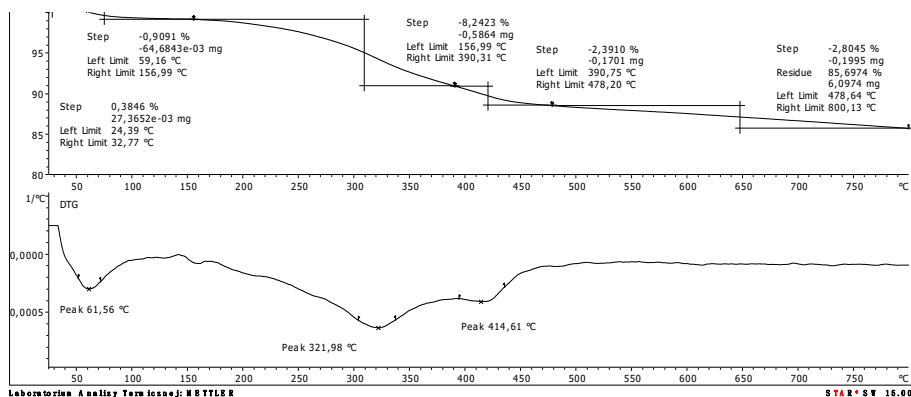

**Figure S32.** Thermogravimetric analysis of CALB-CNTs-CONH-[bmim][N(Tf)<sub>2</sub>] MR 1:0.1

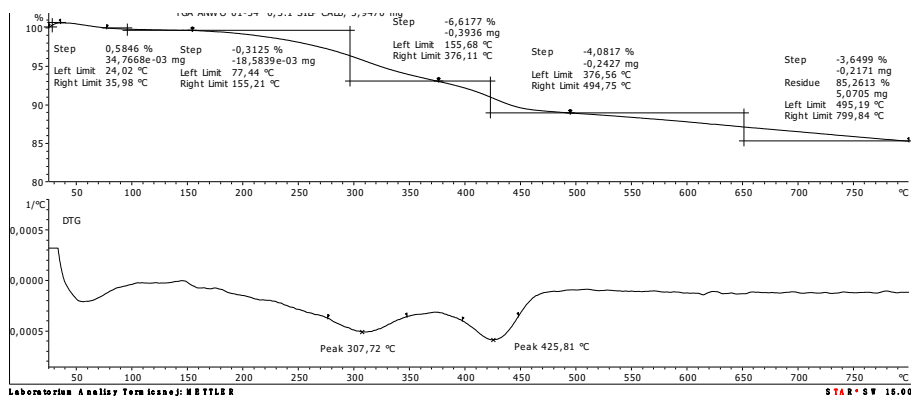

**Figure S33.** Thermogravimetric analysis of CALB-CNTs-CONH-[bmim][N(Tf)<sub>2</sub>] MR 1:0.3

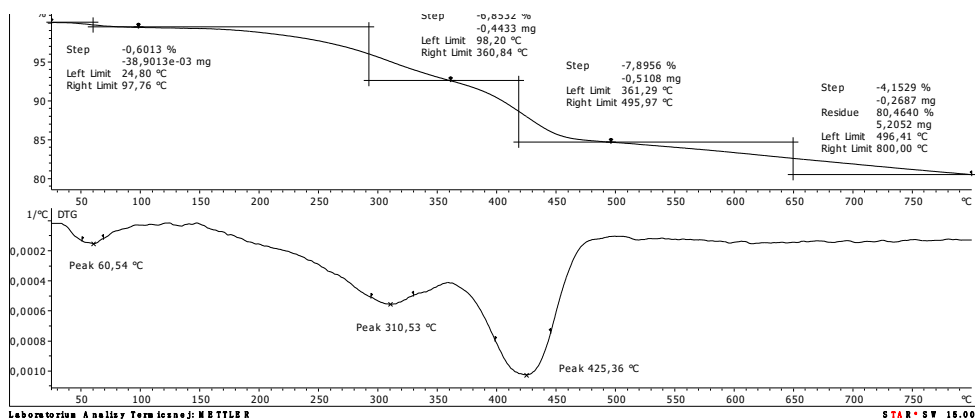

**Figure S34.** Thermogravimetric analysis of CALB-CNTs-CONH-[bmim][N(Tf)<sub>2</sub>] MR 1:0.5

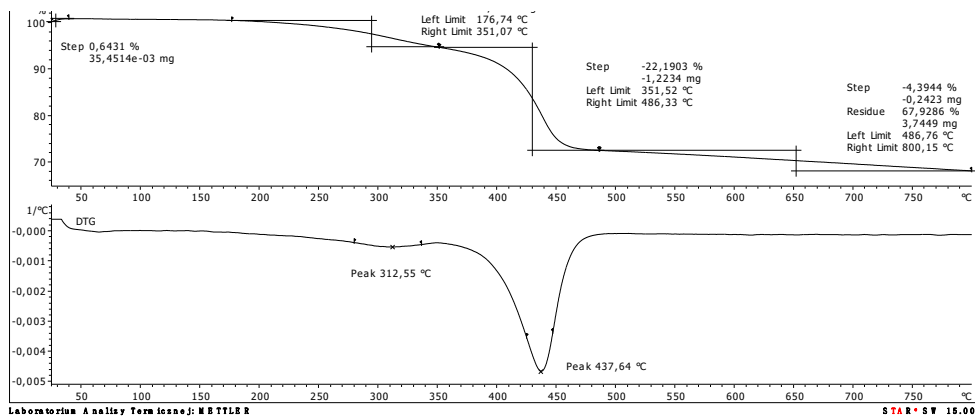

**Figure S35.** Thermogravimetric analysis of CALB-CNTs-CONH-[bmim][N(Tf)<sub>2</sub>] MR 1:0.8

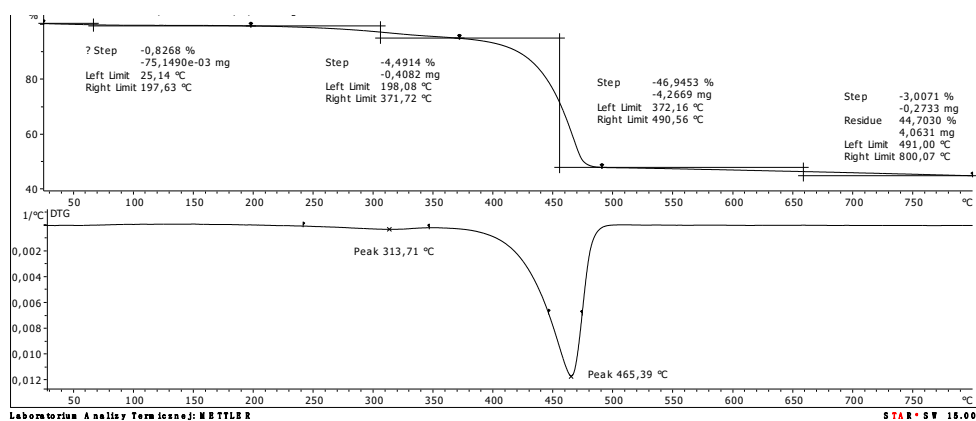

**Figure S36.** Thermogravimetric analysis of CALB-CNTs-CONH-[bmim][N(Tf)<sub>2</sub>] MR 1:1.1

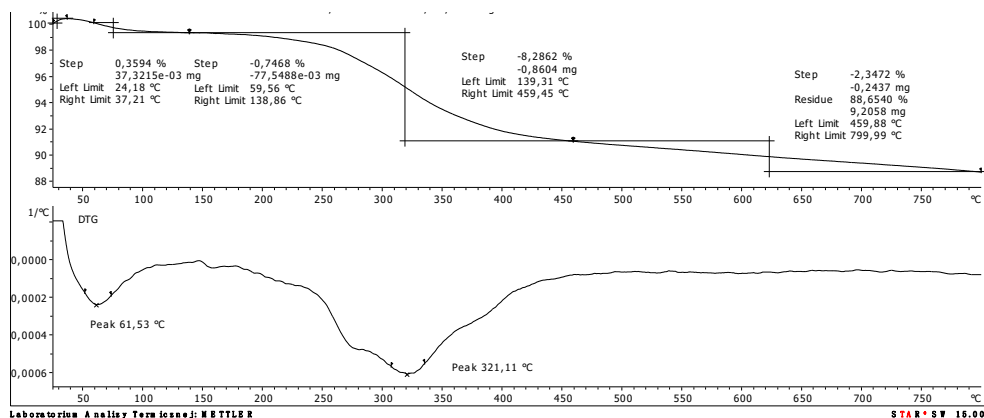

**Figure S37.** Thermogravimetric analysis of CALB-CNTs-C=N-[bmim][N(Tf)<sub>2</sub>] MR 1:0.1

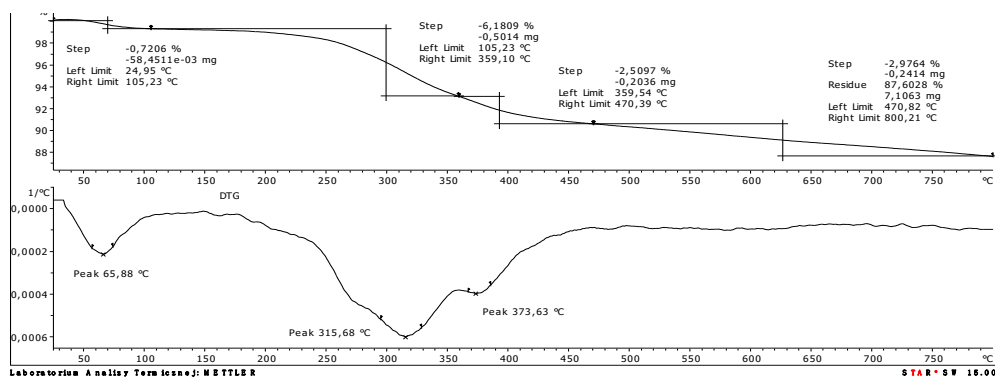

**Figure S38.** Thermogravimetric analysis of CALB-CNTs-C=N-[bmim][N(Tf)<sub>2</sub>] MR 1:0.3

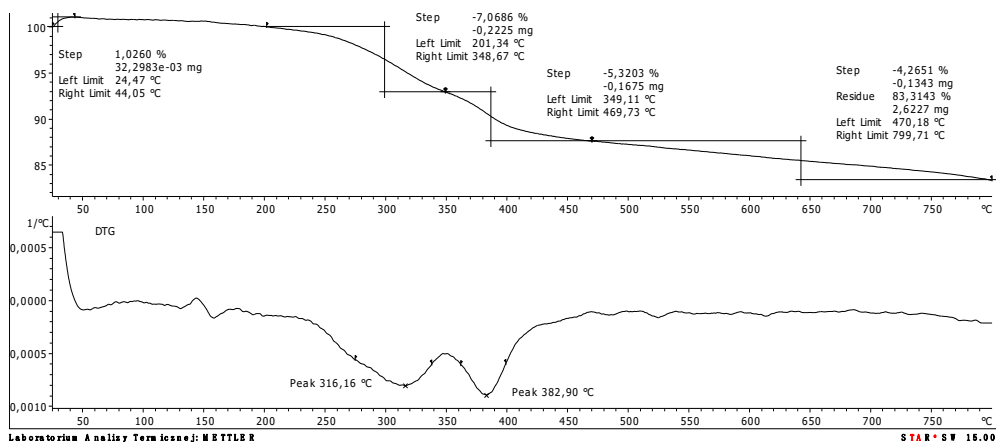

**Figure S39.** Thermogravimetric analysis of CALB-CNTs-C=N-[bmim][N(Tf)<sub>2</sub>] MR 1:0.5

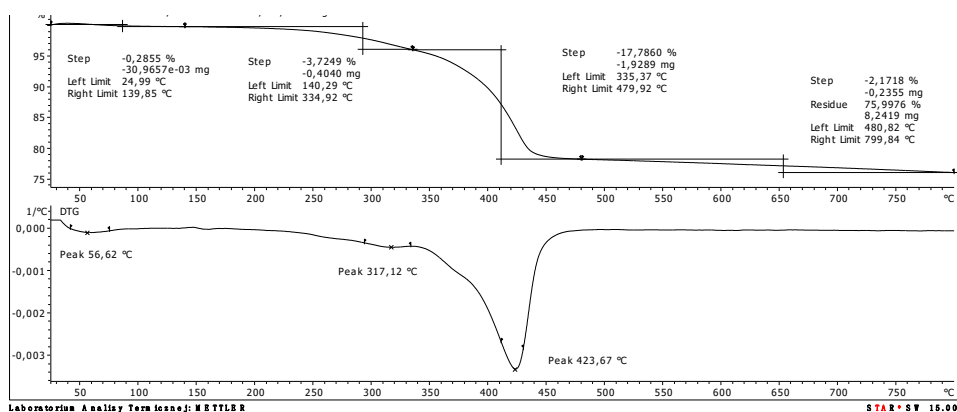

**Figure S40.** Thermogravimetric analysis of CALB-CNTs-C=N-[bmim][N(Tf)<sub>2</sub>] MR 1:0.8

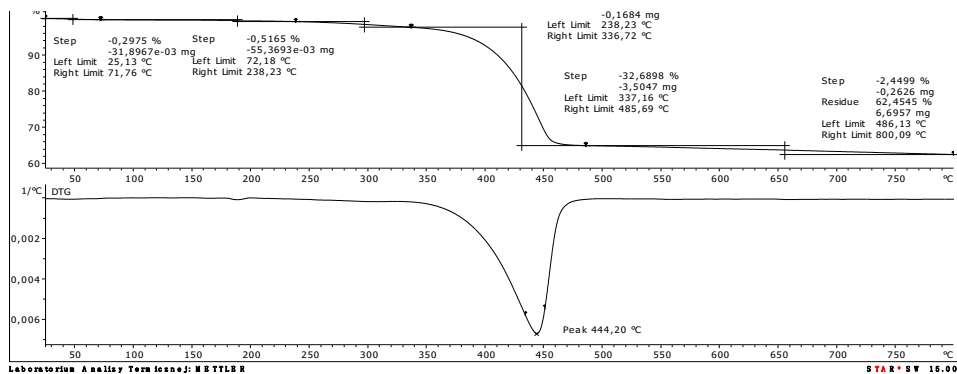

**Figure S41.** Thermogravimetric analysis of CALB-CNTs-C=N-[bmim][N(Tf)<sub>2</sub>] MR 1:1.1

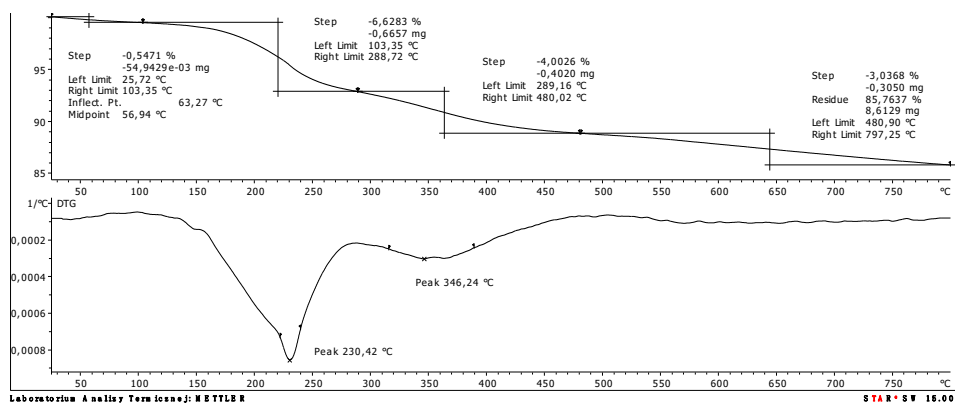

**Figure S42.** Thermogravimetric analysis of CALB-CNTs-CONH-Oc<sub>2</sub>PO<sub>4</sub> after 4<sup>th</sup> reaction run.



## Section S5. IR analysis

The crucial step of both pathways lies in a synthesis of a bond between MWCNTs and an amine. In case of incomplete substitution of functional groups, an activity of final biocatalyst could be lower than it would be possible to achieve. In order to determine types of bonds existing between atoms during a progress of the synthesis, the IR and XPS analyses were performed.

The results of IR analysis of structures A1 and I1 in comparison with starting materials were shown in Table S1 and Figures S43-S44. Performed experiments confirmed the final structures.

**Table S1.** Characteristic bands observed in FT-IR spectra.

|                            | FT-IR (KBr, $\text{cm}^{-1}$ )                                                                                                                                        |
|----------------------------|-----------------------------------------------------------------------------------------------------------------------------------------------------------------------|
| Aromatic structure of CNTs | 3000 – 2800 stretching vibrations of $\text{C}_{\text{Ar}}\text{-H}$ ( $\nu_{\text{C-H}}$ )<br>1660 – 1400 C=C groups in aromatic rings ( $\nu_{\text{C=C}}$ )        |
| CNTs-CONH ( <b>A1</b> )    | 3430 ( $\nu_{\text{N-H}}$ ), 1630 (I amide $\nu_{\text{C=O}}$ ), 1512 (II amide $\delta_{\text{N-H}}$ )<br>1232 ( $\nu_{\text{C-N}}$ ), 664 ( $\gamma_{\text{N-H}}$ ) |
| CNTs-CHO                   | 2920 and 2850 ( $\nu_{\text{O=C-H, asym.}}$ ), 1710 ( $\nu_{\text{C=O}}$ )                                                                                            |
| CNTs-C=N ( <b>I1</b> )     | 1630 ( $\nu_{\text{C=N}}$ )                                                                                                                                           |

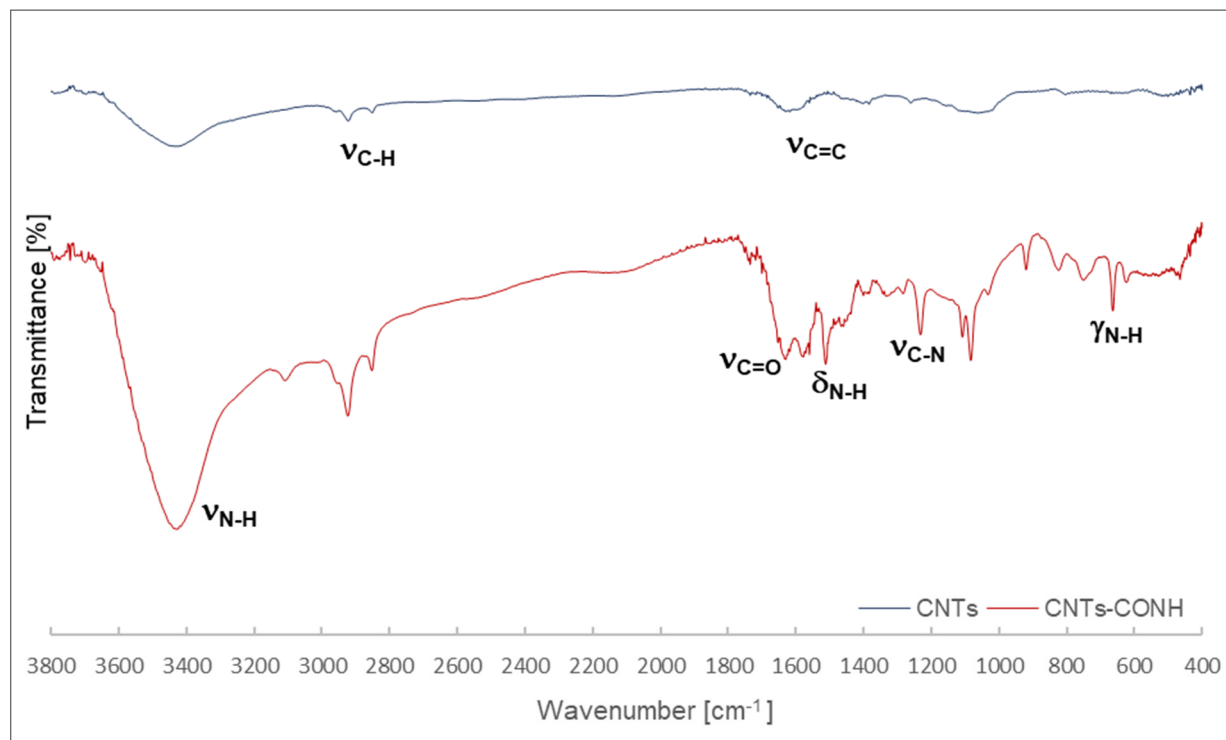

**Figure 43.** FT-IR spectra of pristine CNTs (blue) and CNTs-CONH (**A1**) (red).

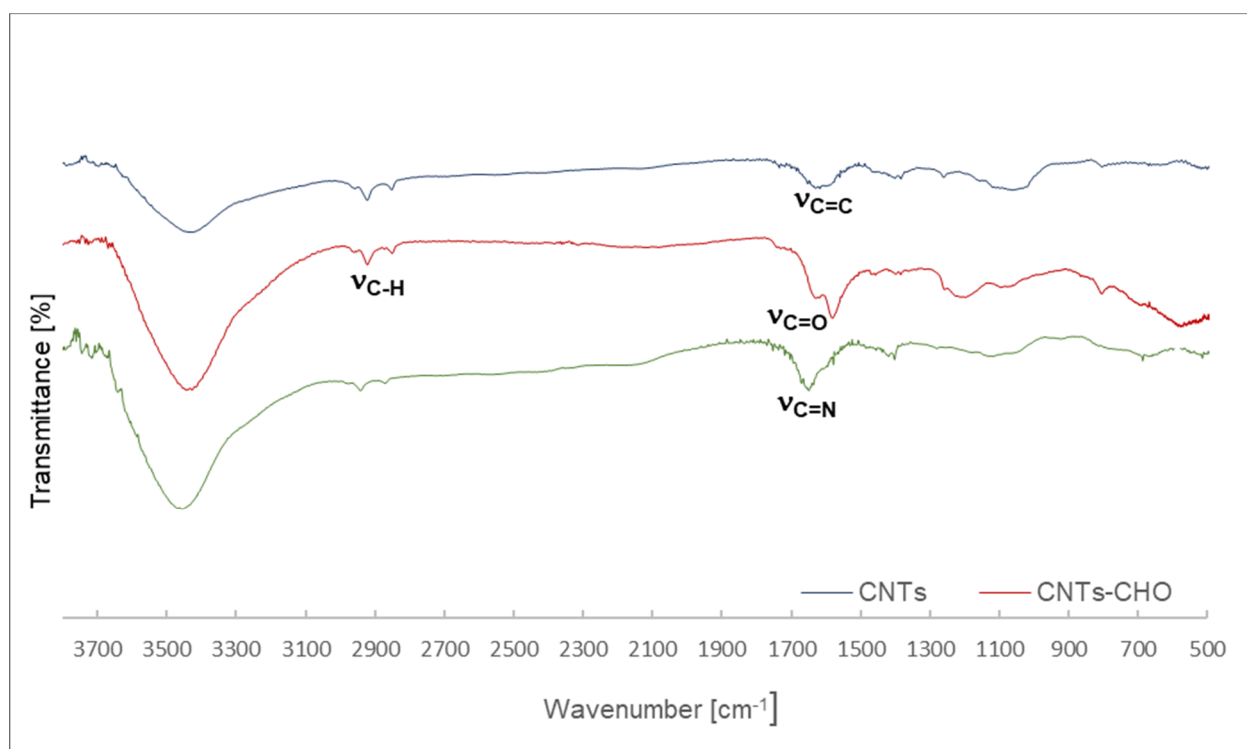

**Figure 44.** FT-IR spectra of pristine CNTs (blue), CNTs-CHO (red) and CNTs-C=N (I1) (green).

## Section S6. XPS analysis

The results of XPS analysis of structures A1, A2, I1 and I2 were shown in Tables S2-S5 and Figures S45-S48. Performed experiments confirmed the final structures.

**Table S2.** XPS analysis of CNTs-CONH (A1).

| Analysis   | BE / eV | Atomic conc., % | interpretation of the structure          |
|------------|---------|-----------------|------------------------------------------|
| <b>C1s</b> | 282.4   | 2.2             | C-C                                      |
|            | 284.5   | 46.1            | C=C                                      |
|            | 286.3   | 27.1            | C-N                                      |
|            | 287.8   | 5.3             | C=O                                      |
| <b>O1s</b> | 530.7   | 0.6             | O=C                                      |
|            | 532.1   | 3.7             | O-C                                      |
|            | 534.1   | 0.6             | O=C                                      |
|            | 535.7   | 0.1             | H-O-H from water adsorbed on the surface |
| <b>N1s</b> | 397.4   | 0.6             | N <sub>2</sub>                           |
|            | 399.5   | 5.7             | C-N from imidazolium ring                |
|            | 401.3   | 5.5             | C-NH from amide bond                     |
|            | 403.1   | 0.4             | C=N from imidazolium ring                |

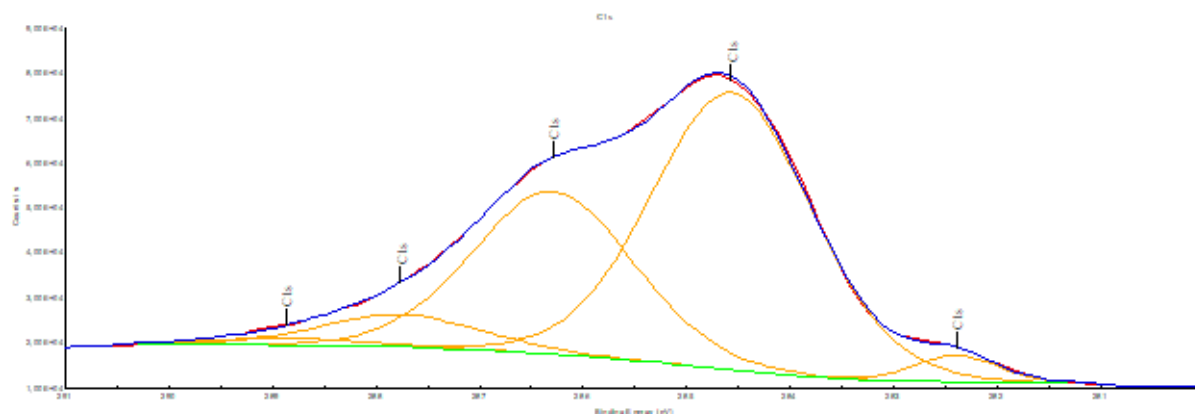

**Figure S45.** XPS analysis of CNTs-CONH (A1).

**Table S3.** XPS analysis of CNTs-CONH-HEX-I (A2).

| Analysis   | BE / eV | Atomic conc., % | interpretation of the structure          |
|------------|---------|-----------------|------------------------------------------|
| <b>C1s</b> | 282.4   | 4.8             | C-C                                      |
|            | 284.5   | 71.3            | C=C                                      |
|            | 286.3   | 14.3            | C-N                                      |
|            | 287.8   | 2.5             | C=O                                      |
| <b>O1s</b> | 531.1   | 1.4             | O=C                                      |
|            | 532.5   | 0.9             | O-C                                      |
|            | 533.8   | 0.6             | O=C                                      |
|            | 536.1   | 0.2             | H-O-H from water adsorbed on the surface |
| <b>N1s</b> | 397.8   | 0.1             | N <sub>2</sub>                           |

|             |       |     |                                        |
|-------------|-------|-----|----------------------------------------|
| <b>I3d5</b> | 399.7 | 0.8 | C-N from imidazolium ring              |
|             | 401.7 | 1.6 | C-NH from amide bond                   |
|             | 403.8 | 0.2 | C-N <sup>+</sup> from imidazolium ring |
|             | 618.4 | 0.9 | iodide (I <sup>-</sup> )               |
|             | 620.5 | 0.2 | I <sub>2</sub>                         |

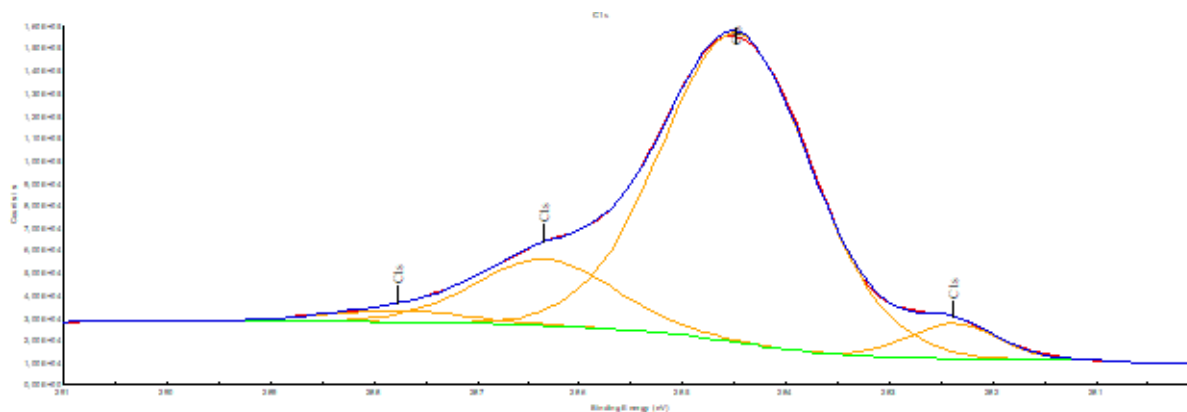

**Figure S46.** XPS analysis of CNTs-CONH-HEX-I (A2).

**Table S4.** XPS analysis of CNTs-C=N (I2).

| Analysis   | BE / eV | Atomic conc., % | interpretation of the structure          |
|------------|---------|-----------------|------------------------------------------|
| <b>C1s</b> | 282.4   | 5.3             | C-C                                      |
|            | 284.5   | 74.8            | C=C                                      |
|            | 286.3   | 12.7            | C-N                                      |
|            | 287.4   | 2.6             | C=N                                      |
| <b>O1s</b> | 530.8   | 0.9             | O=C                                      |
|            | 532.3   | 0.7             | O-C                                      |
|            | 533.7   | 0.5             | O=C                                      |
|            | 536.2   | 0.2             | H-O-H from water adsorbed on the surface |
| <b>N1s</b> | 399.2   | 1.0             | C-N from imidazolium ring                |
|            | 401.2   | 1.2             | C=N from imine bond                      |
|            | 405.7   | 0.1             | C=N from imidazolium ring                |

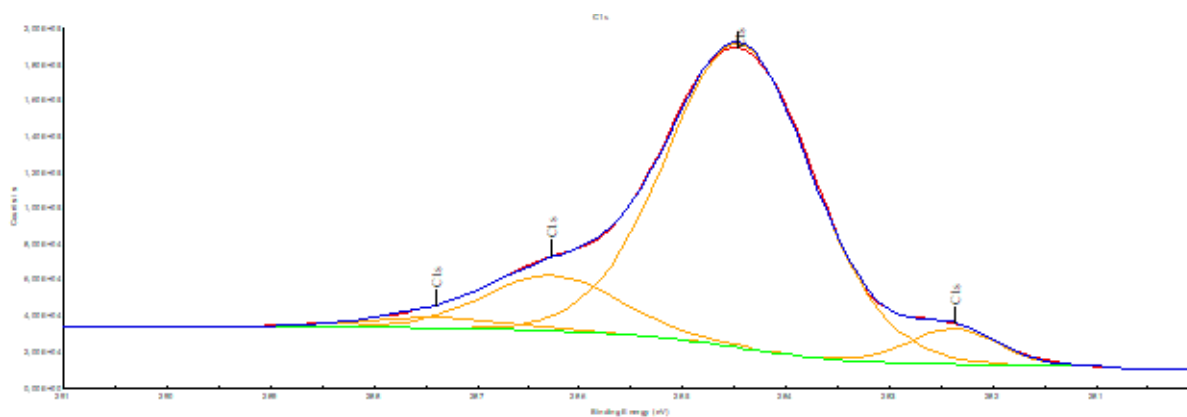

**Figure S47.** XPS analysis of CNTs-C=N (I2).

**Table S5.** XPS analysis of CNTs-C=N-HEX-I (I3).

| Analysis    | BE / eV | Atomic conc., % | interpretation of the structure          |
|-------------|---------|-----------------|------------------------------------------|
| <b>C1s</b>  | 282.5   | 4.3             | C-C                                      |
|             | 284.5   | 77.0            | C=C                                      |
|             | 286.3   | 12.9            | C-N                                      |
|             | 287.7   | 1.2             | C=N                                      |
| <b>O1s</b>  | 531.1   | 1.2             | O=C                                      |
|             | 532.8   | 1.2             | O-C                                      |
|             | 534.3   | 0.5             | O=C                                      |
|             | 536.2   | 0.2             | H-O-H from water adsorbed on the surface |
| <b>N1s</b>  | 399.1   | 0.2             | C-N from imidazolium ring                |
|             | 401.4   | 0.7             | C=N from imine bond                      |
|             | 406.3   | 0.2             | C-N <sup>+</sup>                         |
| <b>I3d5</b> | 618.4   | 0.3             | iodide (I <sup>-</sup> )                 |
|             | 620.4   | 0.1             | I <sub>2</sub>                           |

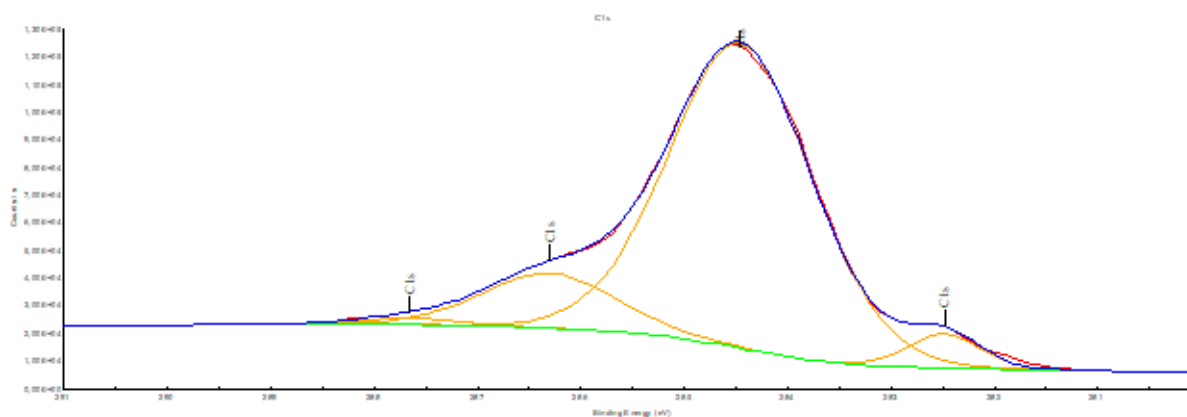

**Figure S48.** XPS analysis of CNTs-C=N-HEX-I (I3).

## Section S7. Elemental analysis.

**Table S6.** Elemental analysis of synthesized structures.

| Structure                                              | Content of atoms: C, H, N<br>(wt.%) |
|--------------------------------------------------------|-------------------------------------|
| CNTs-COOH                                              | 98.12, 0.29, 0.23                   |
| CNTs-CONH (A1)                                         | 96.19, 0.65, 1.83                   |
| CNTs-CONH-HEX-I (A2)                                   | 91.83, 0.92, 1.21                   |
| CNTs-CONH-HEX-N(Tf) <sub>2</sub><br>(A3)               | 86.55, 0.94, 1.44                   |
| CNTs-CONH-HEX-<br>N(CN) <sub>2</sub> (A4)              | 90.84, 0.95, 2.57                   |
| CNTs-CONH-HEX-<br>Oc <sub>2</sub> PO <sub>4</sub> (A5) | 91.83, 0.92, 1.53                   |
| CNTs-CONH-HEX-OcSO <sub>4</sub><br>(A6)                | 88.75, 1.44, 1.49                   |
| CNTs-CHO                                               | 96.19, 0.48, 0.29                   |
| CNTs-C=N (I1)                                          | 95.05, 0.64, 1.01                   |
| CNTs-C=N-HEX-I (I2)                                    | 95.44, 0.52, 0.41                   |
| CNTs-C=N-HEX-N(Tf) <sub>2</sub><br>(I3)                | 91.46, 0.60, 0.91                   |
| CNTs-C=N-HEX-N(CN) <sub>2</sub><br>(I4)                | 91.61, 0.66, 2.47                   |
| CNTs-C=N-HEX-Oc <sub>2</sub> PO <sub>4</sub><br>(I5)   | 96.39, 0.54, 0.44                   |
| CNTs-C=N-HEX-OcSO <sub>4</sub><br>(I6)                 | 94.82, 0.52, 0.45                   |

## Section S8. Influence of the type of an enzyme on the recyclability of biocatalysts

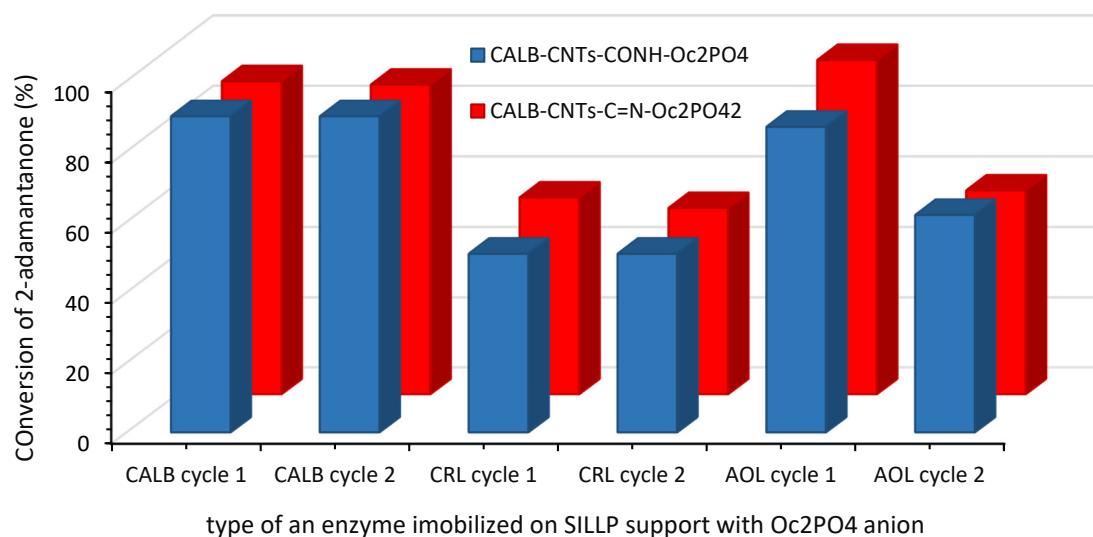

**Figure S49.** Influence of the type of an enzyme on the recyclability of biocatalysts. *Reaction conditions:* 2-adamantanone 1 mmol (0.150 g), toluene 0.5 mL, *n*-octanoic acid 0.5 mL, 0.080 g CALB-CNTs-CONH-Oc<sub>2</sub>PO<sub>4</sub> or CALB-CNTs-C=N-Oc<sub>2</sub>PO<sub>4</sub>2 biocatalyst, 35 % aq. H<sub>2</sub>O<sub>2</sub> 2 mmol (0.194 g), 20 °C, 4 h, 400 rpm.
